# Supplementary material for: Highly luminescent antimony-based organic–inorganic hybrid halides for X-ray imaging and detection
Source: Royal Society of Chemistry journal article supplement (doi:10.1039/d4tc01905a), 2024-01-01
Supplement: d4tc01905a1.pdf [file d4tc01905a1.pdf]

## Supporting Information

### High Luminescent Antimony-based Organic-inorganic Hybrid Halides for X-ray Imaging and Detection

Huiyu chen,<sup>a†</sup> Haixia Cui,<sup>a†</sup> Tianxiang Jiang,<sup>a</sup> Zhe Feng,<sup>a</sup> Yurou Yan,<sup>a</sup> Shujuan Liu,<sup>\*a</sup>  
and Qiang Zhao<sup>\*a,b</sup>

<sup>a</sup> State Key Laboratory of Organic Electronics and Information Displays & Jiangsu Key Laboratory for Biosensors, Institute of Advanced Materials (IAM) & Institute of Flexible Electronics (Future Technology), Nanjing University of Posts & Telecommunications (NUPT), 9 Wenyuan Road, Nanjing 210023, Jiangsu, P. R. China.

<sup>b</sup> College of Electronic and Optical Engineering & College of Flexible Electronics (Future Technology), Jiangsu Province Engineering Research Center for Fabrication and Application of Special Optical Fiber Materials and Devices, Nanjing University of Posts and Telecommunications (NUPT), 9 Wenyuan Road, Nanjing 210023, Jiangsu, P. R. China.

† These authors contributed equally to this work.

\* Address all correspondence to Shujuan Liu, Email: [iamsjliu@njupt.edu.cn](mailto:iamsjliu@njupt.edu.cn); Qiang Zhao, E-mail: [iamqzhao@njupt.edu.cn](mailto:iamqzhao@njupt.edu.cn)

## Experimental Section

**Materials:** Antimony trichloride ( $\text{SbCl}_3$ , Macklin, 99%), Antimony bromide ( $\text{SbBr}_3$ , Macklin, 99%), Benzyltriethylammoniumchloride ( $[\text{TEBA}]\text{Cl}$ , Bide, 98%), Benzyltriethylammonium bromide ( $[\text{TEBA}]\text{Br}$ , Bide, 98%), N, N-Dimethylformamide (DMF, Macklin, AR), Acetonitrile (ACN, Aladdin, 99%). Anhydrous ethyl ether was purchased from Sinopharm Chemical Reagent Co., Ltd. (China).

**Synthesis of TEBA-0:** The compound was synthesized by the classical antisolvent method at room temperature.  $\text{SbCl}_3$  (1 mmol, 0.228 g) and  $[\text{TEBA}]\text{Cl}$  (2 mmol, 0.228 g) were dissolved in 5 mL DMF solution and kept stirring for 8h at room temperature. Subsequently, the transparent block crystals of  $(\text{TEBA})_2\text{SbCl}_5$  were collected by slowly diffusing anhydrous ethyl ether into the DMF for 3 days and lastly dried through vacuum for 24 h. Yield: 92.5%.

**Synthesis of TEBA-1:** The synthesis procedure of TEBA-1 is similar to that of TEBA-0, except  $\text{SbCl}_3$  (1 mmol, 0.228 g),  $[\text{TEBA}]\text{Cl}$  (1 mmol, 0.228 g) and  $[\text{TEBA}]\text{Br}$  (1 mmol, 0.272 g) were used as raw materials. Yield: 91.2%.

**Synthesis of TEBA-2:** The synthesis procedure of TEBA-2 is similar to that of TEBA-0, except  $\text{SbCl}_3$  (1 mmol, 0.228 g) and  $[\text{TEBA}]\text{Br}$  (2 mmol, 0.544 g) were used as raw materials. Yield: 94.1%.

**Synthesis of TEBA-3:** The compound was prepared by cooling hot saturated solution crystallization.  $\text{SbBr}_3$  (1 mmol, 0.361 g) and  $[\text{TEBA}]\text{Cl}$  (2 mmol, 0.456 g) were dissolved in 5 mL ACN solution at 60 °C and then kept stand for 3 days at room temperature. After that, the transparent block crystals of TEBA-3 were obtained by anhydrous ethyl ether washing and lastly dried through a vacuum for 24 h. Yield: 89.7%.

**Synthesis of TEBA-4:** The synthesis procedure of TEBA-4 is similar to that of TEBA-3, except  $\text{SbBr}_3$  (1 mmol, 0.361 g),  $[\text{TEBA}]\text{Cl}$  (1 mmol, 0.228 g) and  $[\text{TEBA}]\text{Br}$  (1 mmol, 0.272 g) were used as raw materials. Yield: 86.4%.

**Synthesis of TEBA-5:** The synthesis procedure of TEBA-5 is similar to that of TEBA-3, except  $\text{SbBr}_3$  (1 mmol, 0.361 g) and  $[\text{TEBA}]\text{Br}$  (2 mmol, 0.544 g) were used as raw materials. Yield: 88.5%.

**Fabrication of TEBA-2 film:** Firstly, TEBA-2 crystals were ground into fine powders for 30 min in the agate mortar. Then, the powders (0.3 g) were dissolved and continuously stirred in 5 mL of 0.1 g/mL toluene/PMMA mixing solution for 5 h. Lastly, the homogeneous and viscous liquid was slowly poured into the polytetrafluoroethylene mold and evaporated for approximately 12 h to obtain the thin film of TEBA-2 at room temperature.

## Characterizations

**Structural Characterization:** The single crystal structures of  $(\text{TEBA})_2\text{SbCl}_{5-x}\text{Br}_x$  were collected on a Bruker Smart Apex CCD diffractometer at room temperature and the graphite monochrome Mo-K radiation ( $\lambda = 0.71073 \text{ \AA}$ ) was used as the radiation source. The structures were solved by direct methods using SHELXS-2014<sup>[1]</sup> and refined by full-matrix least squares on  $F^2$  using SHELXL-2014<sup>[2]</sup>. Powder X-ray diffraction (PXRD) tests of  $(\text{TEBA})_2\text{SbCl}_{5-x}\text{Br}_x$  were performed on an X-ray diffractometer D8 Advance A25. Thermogravimetric analysis (TGA) was conducted at a heating rate of  $10 \text{ }^\circ\text{C}/\text{min}$  in an air atmosphere ( $30 \sim 500 \text{ }^\circ\text{C}$ ) on the NETZSCH STA-2500 synchronous thermal analyzer. X-ray photoelectron spectroscopy (XPS) was tested by a Shimadzu Axis Supra spectrometer. The C 1s peak at 284.8 eV was used as the internal standard for XPS measurements.

**Photoluminescence Measurements:** The photoluminescence excitation (PLE) spectra, photoluminescence (PL) emission spectra, emission lifetimes and photoluminescence quantum yields (PLQYs) of  $(\text{TEBA})_2\text{SbCl}_{5-x}\text{Br}_x$  crystals were obtained on an Edinburgh Instrument FLS980 Spectrophotometer. UV-visible absorption spectra were measured on a Shimadzu UV-2600 spectrophotometer.

**Scintillation Characterization:** The radioluminescence (RL) spectra and linear response to X-ray dose rate were measured with a spectrofluorometer (FLS980, Edinburgh Instruments) under irradiation of X-ray source (Mini-X2, Amptek; Au target; tube voltage, 50 kV). The X-ray dose rates were altered by adjusting the current of the X-ray tube (5-70  $\mu\text{A}$ ). In advance, the dose rates were calibrated by an X-ray ion chamber dose meter (Radcal Accu-DOSE<sup>+</sup>, 10X6-60).

**Determination of X-ray excited relative light yields:** The X-ray relative light yields of  $(\text{TEBA})_2\text{SbCl}_{5-x}\text{Br}_x$  single crystals were measured with the help of commercial LuAG: Ce as a reference.  $(\text{TEBA})_2\text{SbCl}_{5-x}\text{Br}_x$  with a thickness of 100  $\mu\text{m}$  and LuAG: Ce were placed in the same position. The corresponding photon counting results ( $\text{PC}_{\text{measured}}$ ) were then obtained by integrating the steady-state XEL spectra. Compared with reference LuAG: Ce, the corresponding relative light yields of  $(\text{TEBA})_2\text{SbCl}_{5-x}\text{Br}_x$  were calculated according to equation (1) and (2). The equations were given as follows:

$$\text{PC}_{\text{normalized}} = \frac{\text{PC}_{\text{measured}}}{\text{AE}(d)} \quad (1)$$

$$\text{LY}_s = \text{LY}_{\text{LuAG:Ce}} \frac{\text{PC}_{\text{normalized}}(S)}{\text{PC}_{\text{normalized}}(\text{LuAG:Ce})} \quad (2)$$

where  $\text{LY}_{\text{LuAG:Ce}}$  is the light yield of LuAG: Ce (22000 photons  $\text{MeV}^{-1}$ ),  $\text{PC}_{\text{normalized}}(S)$  and  $\text{PC}_{\text{normalized}}(\text{LuAG:Ce})$  are the photon counts of our scintillators and LuAG: Ce normalized to respective X-ray attenuation efficiencies.

**Table S1.** Detailed Single crystal X-ray data of TEBA-0, TEBA-1, and TEBA-2.

| Complex          | TEBA-0                                                     | TEBA-1                                                                        | TEBA-2                                                                        |
|------------------|------------------------------------------------------------|-------------------------------------------------------------------------------|-------------------------------------------------------------------------------|
| Chemical Formula | $\text{C}_{26}\text{H}_{44}\text{Cl}_5\text{N}_2\text{Sb}$ | $\text{C}_{26}\text{H}_{44}\text{Br}_{0.8}\text{Cl}_{4.2}\text{N}_2\text{Sb}$ | $\text{C}_{26}\text{H}_{44}\text{Br}_{1.6}\text{Cl}_{3.4}\text{N}_2\text{Sb}$ |
| Formula Weight   | 683.68                                                     | 719.46                                                                        | 753.9                                                                         |
| Crystal System   | $P2_12_12_1$                                               | $P2_12_12_1$                                                                  | $P2_12_12_1$                                                                  |
| Space Group      | orthorhombic                                               | orthorhombic                                                                  | orthorhombic                                                                  |
| $a$ (Å)          | 9.3198(7)                                                  | 9.3120(15)                                                                    | 9.3572(9)                                                                     |
| $b$ (Å)          | 13.7258(10)                                                | 13.829(3)                                                                     | 13.8687(13)                                                                   |
| $c$ (Å)          | 24.4550(17)                                                | 24.661(4)                                                                     | 24.805(2)                                                                     |

|                                   |               |               |               |
|-----------------------------------|---------------|---------------|---------------|
| $\alpha$ (°)                      | 90            | 90            | 90            |
| <b>Complex</b>                    | <b>TEBA-0</b> | <b>TEBA-1</b> | <b>TEBA-2</b> |
| $\beta$ (°)                       | 90            | 90            | 90            |
| $\gamma$ (°)                      | 90            | 90            | 90            |
| $V$ (Å <sup>3</sup> )             | 3128.3(4)     | 3175.8(10)    | 3218.9(5)     |
| Z value                           | 4             | 4             | 4             |
| $D$ (calcd) (g cm <sup>-3</sup> ) | 1.452         | 1.505         | 1.556         |
| Temperature (K)                   | 297.0 K       | 295.0 K       | 295.0 K       |
| $F(000)$                          | 1400.0        | 1457.9        | 1510.3        |
| $\mu$ (mm <sup>-1</sup> )         | 1.327         | 2.252         | 3.145         |
| $R_1/wR_2$                        | $R_1=0.0372$  | $R_1=0.0252$  | $R_1=0.0525$  |
| [ $I > 2\sigma(I)$ ]              | $wR_2=0.0605$ | $wR_2=0.0578$ | $wR_2=0.0953$ |
| $R_1/wR_2$                        | $R_1=0.0555$  | $R_1=0.0288$  | $R_1=0.0729$  |
| [all data]                        | $wR_2=0.0671$ | $wR_2=0.0594$ | $wR_2=0.1012$ |
| GOF                               | 0.997         | 1.045         | 1.048         |

**Table S2.** Detailed Single crystal X-ray data of TEBA-3, TEBA-4 and TEBA-5.

| <b>Complex</b>   | <b>TEBA-3</b>                                                                           | <b>TEBA-4</b>                                                                           | <b>TEBA-5</b>                                                     |
|------------------|-----------------------------------------------------------------------------------------|-----------------------------------------------------------------------------------------|-------------------------------------------------------------------|
| Chemical Formula | C <sub>26</sub> H <sub>44</sub> Br <sub>3.04</sub> Cl <sub>1.96</sub> N <sub>2</sub> Sb | C <sub>26</sub> H <sub>44</sub> Br <sub>3.97</sub> Cl <sub>1.03</sub> N <sub>2</sub> Sb | C <sub>26</sub> H <sub>44</sub> Br <sub>5</sub> N <sub>2</sub> Sb |
| Formula Weight   | 817.03                                                                                  | 859.81                                                                                  | 905.93                                                            |

| Crystal System                    | $P2_12_12_1$  | $P2_12_12_1$  | $P2_12_12_1$  |
|-----------------------------------|---------------|---------------|---------------|
| Complex                           | TEBA-3        | TEBA-4        | TEBA-5        |
| Space Group                       | orthorhombic  | orthorhombic  | orthorhombic  |
| $a$ (Å)                           | 9.4310(3)     | 9.3820(3)     | 9.747(10)     |
| $b$ (Å)                           | 14.0220(4)    | 25.1850(8)    | 14.399(14)    |
| $c$ (Å)                           | 25.166(7)     | 13.979(5)     | 25.67(2)      |
| $\alpha$ (°)                      | 90            | 90            | 90            |
| $\beta$ (°)                       | 90            | 90            | 90            |
| $\gamma$ (°)                      | 90            | 90            | 90            |
| $V$ (Å <sup>3</sup> )             | 3328.0(16)    | 3302.7(19)    | 3603.0(6)     |
| Z value                           | 4             | 4             | 4             |
| $D$ (calcd) (g cm <sup>-3</sup> ) | 1.631         | 1.729         | 1.670         |
| Temperature (K)                   | 296.0 K       | 297.0 K       | 296.0 K       |
| $F(000)$                          | 1613.0        | 1681.3        | 1754.3        |
| $\mu$ (mm <sup>-1</sup> )         | 4.608         | 5.730         | 6.326         |
| $R_1/wR_2$                        | $R_1=0.0552$  | $R_1=0.0771$  | $R_1=0.0497$  |
| [ $I > 2\sigma(I)$ ]              | $wR_2=0.110$  | $wR_2=0.1436$ | $wR_2=0.0849$ |
| $R_1/wR_2$                        | $R_1=0.0753$  | $R_1=0.1214$  | $R_1=0.0882$  |
| [all data]                        | $wR_2=0.1180$ | $wR_2=0.1585$ | $wR_2=0.0957$ |
| GOF                               | 1.063         | 1.023         | 1.000         |

**Table S3.** The cell parameters of (TEBA)<sub>2</sub>SbCl<sub>5-x</sub>Br<sub>x</sub> single crystals.

|                       | TEBA-0                  | TEBA-1                  | TEBA-2                  | TEBA-3                  | TEBA-4                  | TEBA-5                  |
|-----------------------|-------------------------|-------------------------|-------------------------|-------------------------|-------------------------|-------------------------|
| Cell                  | 3128.32                 | 3175.74                 | 3219                    | 3327.99                 | 3303.04                 | 3602.71                 |
| volume                |                         |                         |                         |                         |                         |                         |
| $\delta d = 1/5 \sum$ | 1.67442*10 <sup>3</sup> | 2.62247*10 <sup>3</sup> | 3.23355*10 <sup>3</sup> | 3.00529*10 <sup>3</sup> | 2.28386*10 <sup>3</sup> | 1.64349*10 <sup>3</sup> |
| $[(d_r-d)/d]^2$       |                         |                         |                         |                         |                         |                         |

**Table S4.** Fractional Atomic Coordinates ( $\times 10^4$ ) for TEBA-0.

| Atom | X           | Y          | Z          |
|------|-------------|------------|------------|
| Sb1  | 3215.35(16) | 705.58(11) | 3391.69(6) |
| Cl1  | 2698.0(7)   | 2387.1(4)  | 3499.7(3)  |
| Cl5  | 5076.0(7)   | 722.0(6)   | 4210.4(3)  |
| Cl4  | 1009.9(8)   | 415.7(5)   | 4067.3(3)  |
| Cl3  | 1596.7(8)   | 610.6(5)   | 2531.1(3)  |
| Cl2  | 5278.2(8)   | 1236.6(6)  | 2767.9(3)  |
| N1   | 1903(2)     | 3422.1(13) | 1719.4(8)  |
| N2   | 7570(2)     | 3410.0(15) | 4051.6(8)  |
| C12  | 664(3)      | 2775.9(18) | 1888.3(11) |
| C19  | 5142(2)     | 4269(2)    | 3968.4(9)  |
| C7   | 1908(3)     | 3586.4(17) | 1099.4(10) |
| C8   | 3250(3)     | 2893.0(17) | 1907.1(11) |
| C6   | 1881(3)     | 2691.8(17) | 752.9(10)  |
| C20  | 6041(3)     | 3397.1(19) | 3833.8(10) |
| C25  | 8625(3)     | 2406(2)    | 3262.4(12) |
| C3   | 1800(4)     | 1107(2)    | 38.6(11)   |
| C24  | 8315(3)     | 2476.4(19) | 3869.0(11) |
| C13  | -824(3)     | 3187(2)    | 1801.2(13) |
| C26  | 7578(3)     | 3447(2)    | 4674.4(10) |

| <b>Atom</b> | <b>X</b> | <b>Y</b>   | <b>Z</b>   |
|-------------|----------|------------|------------|
| C5          | 3114(3)  | 2208(2)    | 603.8(12)  |
| C10         | 1790(3)  | 4433.0(16) | 1971.4(10) |
| C21         | 8318(3)  | 4311(2)    | 3836.9(10) |
| C1          | 588(3)   | 2358(2)    | 536.1(12)  |
| C4          | 3077(4)  | 1421(2)    | 251.2(13)  |
| C9          | 4644(3)  | 3444(2)    | 1825.5(14) |
| C17         | 4373(3)  | 4326(2)    | 4453.0(12) |
| C23         | 9913(3)  | 4381(2)    | 3977.7(13) |
| C11         | 1836(4)  | 4447(2)    | 2590.5(11) |
| C18         | 4965(3)  | 5005(2)    | 3589.2(12) |
| C22         | 6914(4)  | 2584(2)    | 4959.7(12) |
| C14         | 4061(3)  | 5778(2)    | 3691.5(13) |
| C16         | 3469(3)  | 5104(3)    | 4555.5(14) |
| C15         | 3326(3)  | 5831(2)    | 4175.7(14) |
| C2          | 554(4)   | 1570(2)    | 182.7(13)  |

**Table S5.** Fractional Atomic Coordinates ( $\times 10^4$ ) for TEBA-1.

| <b>Atom</b> | <b>X</b>  | <b>Y</b>   | <b>Z</b>   |
|-------------|-----------|------------|------------|
| Cl1         | 4813.9(7) | 687.1(6)   | 5774.8(2)  |
| Br1         | 9031.1(7) | 419.1(5)   | 5919.6(3)  |
| Cl4         | 7283.4(9) | 2390.2(7)  | 6502.0(3)  |
| Br4         | 8414.1(9) | 603.9(7)   | 7472.5(3)  |
| Br3         | 4699.7(9) | 1241.4(8)  | 7242.4(3)  |
| N2          | 2404(3)   | 3425(2)    | 5949.9(11) |
| N1          | 8079(3)   | 3416.3(19) | 8279.6(11) |
| C8          | 9313(4)   | 2770(3)    | 8111.1(15) |
| C20         | 3947(4)   | 3404(3)    | 6161.4(14) |
| C25         | 1677(4)   | 4323(3)    | 6168.7(14) |



| <b>Atom</b> | <b>X</b>  | <b>Y</b>   | <b>Z</b>   |
|-------------|-----------|------------|------------|
| C21         | 2387(4)   | 3466(3)    | 5330.6(13) |
| C7          | 8081(4)   | 3579(3)    | 8894.0(13) |
| C23         | 1656(4)   | 2499(3)    | 6131.2(15) |
| C18         | 5026(2)   | 4996.2(19) | 6412.7(7)  |
| C19         | 4862(2)   | 4268.8(16) | 6028.7(9)  |
| C14         | 5610(3)   | 4315.3(18) | 5541.7(8)  |
| C15         | 6523(3)   | 5089(2)    | 5438.7(9)  |
| C16         | 6687(3)   | 5816.4(18) | 5822.8(12) |
| C17         | 5939(3)   | 5769.9(17) | 6309.7(11) |
| C12         | 6746(4)   | 2885(3)    | 8093.0(15) |
| C26         | 82(4)     | 4406(4)    | 6034.5(18) |
| C9          | 10812(4)  | 3178(3)    | 8196.3(17) |
| C22         | 3023(5)   | 2608(3)    | 5044.1(16) |
| C10         | 8190(4)   | 4417(3)    | 8027.8(13) |
| C1          | 9415(2)   | 2367.7(19) | 9455.6(10) |
| C6          | 8112(3)   | 2681.7(15) | 9244.6(9)  |
| C5          | 6846(2)   | 2214.4(18) | 9387.8(10) |
| C4          | 6884(3)   | 1433.0(18) | 9742.0(11) |
| C3          | 8187(3)   | 1118.9(16) | 9953.0(9)  |
| C2          | 9453(2)   | 1586(2)    | 9809.8(11) |
| C24         | 1364(4)   | 2426(3)    | 6740.1(16) |
| C11         | 8152(5)   | 4430(3)    | 7415.0(15) |
| C13         | 5335(4)   | 3439(3)    | 8174.6(19) |
| Br2         | 4813.9(7) | 687.1(6)   | 5774.8(2)  |
| Cl2a        | 8414.1(9) | 603.9(7)   | 7472.5(3)  |
| Cl5a        | 9031.1(7) | 419.1(5)   | 5919.6(3)  |
| Cl3a        | 4699.7(9) | 1241.4(8)  | 7242.4(3)  |
| Br5         | 7283.4(9) | 2390.2(7)  | 6502.0(3)  |

**Table S6.** Fractional Atomic Coordinates ( $\times 10^4$ ) for TEBA-2.

| Atom | X          | Y         | Z           |
|------|------------|-----------|-------------|
| Sb1  | 3235.1(4)  | 9279.8(2) | 3385.97(13) |
| Br4  | 5230.7(8)  | 9323.9(6) | 4231.2(3)   |
| Br1  | 953.3(9)   | 9579.3(6) | 4087.1(3)   |
| Cl4  | 1577.7(13) | 9407.0(7) | 2523.6(4)   |
| Cl1  | 5328.7(13) | 8751.5(9) | 2750.3(5)   |
| Cl5  | 2729.9(14) | 7602.8(8) | 3501.5(5)   |
| N1   | 7611(4)    | 6563(3)   | 4049.9(17)  |
| N2   | 1935(4)    | 6592(3)   | 1719.7(17)  |
| C7   | 6075(5)    | 6597(4)   | 3844(2)     |
| C25  | 701(5)     | 7235(4)   | 1891(2)     |
| C12  | 8322(5)    | 5666(4)   | 3830(2)     |
| C8   | 7645(6)    | 6514(4)   | 4659(2)     |
| C26  | -808(5)    | 6820(4)   | 1803(3)     |
| C10  | 8370(7)    | 7484(4)   | 3867(2)     |
| C5   | 4979(4)    | 5012(3)   | 3591.3(12)  |
| C6   | 5152(3)    | 5736(2)   | 3973.3(14)  |
| C1   | 4411(4)    | 5692(3)   | 4458.3(13)  |
| C2   | 3496(4)    | 4924(3)   | 4561.3(14)  |
| C3   | 3323(4)    | 4200(2)   | 4179.3(18)  |
| C4   | 4065(4)    | 4244(2)   | 3694.3(16)  |
| C9   | 7023(8)    | 7383(4)   | 4952(3)     |
| C13  | 9923(6)    | 5571(5)   | 3958(3)     |
| C23  | 1830(6)    | 5596(3)   | 1968.0(19)  |
| C21  | 3266(6)    | 7115(4)   | 1907(2)     |
| C20  | 1929(6)    | 6424(3)   | 1111(2)     |
| C24  | 1875(7)    | 5594(4)   | 2579(2)     |
| C11  | 8639(7)    | 7552(5)   | 3260(2)     |

| <b>Atom</b> | <b>X</b>   | <b>Y</b>  | <b>Z</b>  |
|-------------|------------|-----------|-----------|
| C18         | 597(3)     | 7630(3)   | 548.2(16) |
| C19         | 1895(4)    | 7320(2)   | 758.8(13) |
| C14         | 3154(3)    | 7786(3)   | 614.9(16) |
| C15         | 3115(4)    | 8562(3)   | 260.6(16) |
| C16         | 1817(5)    | 8872(2)   | 50.0(14)  |
| C17         | 559(4)     | 8406(3)   | 193.8(16) |
| C22         | 4673(6)    | 6565(4)   | 1823(3)   |
| Cl3         | 953.3(9)   | 9579.3(6) | 4087.1(3) |
| Cl2         | 5230.7(8)  | 9323.9(6) | 4231.2(3) |
| Br2         | 1577.7(13) | 9407.0(7) | 2523.6(4) |
| Br3         | 5328.7(13) | 8751.5(9) | 2750.3(5) |
| Br5a        | 2729.9(14) | 7602.8(8) | 3501.5(5) |

**Table S7.** Fractional Atomic Coordinates ( $\times 10^4$ ) for TEBA-3.

| <b>Atom</b> | <b>X</b>   | <b>Y</b>   | <b>Z</b>   |
|-------------|------------|------------|------------|
| Sb1         | 6736.6(6)  | 9263.2(4)  | 3391.3(2)  |
| Br1         | 4730.2(11) | 9322.1(9)  | 4235.4(4)  |
| Br4         | 9026.3(12) | 9588.8(8)  | 4092.3(4)  |
| Br2         | 8426.4(16) | 9422.6(10) | 2520.4(5)  |
| Cl1         | 4607.3(16) | 8732.1(12) | 2741.6(5)  |
| Cl2         | 7249.9(19) | 7570.3(13) | 3506.9(7)  |
| N1          | 2347(7)    | 6548(5)    | 4051(2)    |
| N2          | 8058(7)    | 6594(5)    | 1715(3)    |
| C1          | 4810(6)    | 5732(4)    | 3983(2)    |
| C26         | 5534(7)    | 5693(5)    | 4463(2)    |
| C25         | 6455(7)    | 4941(5)    | 4567(2)    |
| C3          | 6653(7)    | 4230(4)    | 4189(3)    |
| C13         | 5929(7)    | 4270(4)    | 3709(3)    |
| C8          | 5008(7)    | 5021(5)    | 3605.3(18) |

---

| <b>Atom</b> | <b>X</b>   | <b>Y</b>   | <b>Z</b>  |
|-------------|------------|------------|-----------|
| C4          | 1646(10)   | 5651(7)    | 3832(3)   |
| C6          | 1313(11)   | 7512(8)    | 3267(4)   |
| C10         | 2294(10)   | 6516(7)    | 4652(3)   |
| C12         | 10803(10)  | 6845(8)    | 1802(4)   |
| C14         | 6710(11)   | 7118(7)    | 1895(4)   |
| C16         | 3878(9)    | 6592(7)    | 3849(3)   |
| C18         | 1577(12)   | 7453(7)    | 3865(4)   |
| C20         | 9272(10)   | 7227(7)    | 1882(4)   |
| C22         | 8118(12)   | 5610(7)    | 2565(3)   |
| C24         | 8154(10)   | 5618(6)    | 1964(3)   |
| C7          | 8072(10)   | 6442(6)    | 1106(3)   |
| C2          | 50(11)     | 5554(8)    | 3945(4)   |
| C17         | 6870(6)    | 7781(5)    | 620(2)    |
| C5          | 8119(7)    | 7317(3)    | 759(2)    |
| C11         | 9404(6)    | 7618(5)    | 547(3)    |
| C23         | 9440(7)    | 8383(5)    | 196(2)    |
| C15         | 8191(9)    | 8846(4)    | 56(2)     |
| C21         | 6906(7)    | 8545(4)    | 269(3)    |
| C9          | 2883(14)   | 7350(7)    | 4949(4)   |
| C19         | 5302(12)   | 6584(8)    | 1806(4)   |
| Cl3a        | 9026.3(12) | 9588.8(8)  | 4092.3(4) |
| Cl2a        | 8426.4(16) | 9422.6(10) | 2520.4(5) |
| Br1a        | 4607.3(16) | 8732.1(12) | 2741.6(5) |
| Br3         | 7249.9(19) | 7570.3(13) | 3506.9(7) |
| Cl5         | 4730.2(11) | 9322.1(9)  | 4235.4(4) |

---

**Table S8.** Fractional Atomic Coordinates ( $\times 10^4$ ) for TEBA-4.

| <b>Atom</b> | <b>X</b>   | <b>Y</b>  | <b>Z</b>   |
|-------------|------------|-----------|------------|
| Sb1         | 5786.9(8)  | 4102.2(3) | 6753.9(5)  |
| Br1         | 7785.3(14) | 3263.2(5) | 6814.8(9)  |
| Br3         | 7928.4(16) | 4760.7(6) | 6216.9(11) |
| Cl2         | 5255.2(19) | 3986.2(7) | 5035.3(11) |
| N1          | 4443(9)    | 5801(4)   | 4104(5)    |
| N2          | 10178(9)   | 3452(3)   | 4028(5)    |
| C1          | 4334(14)   | 5545(4)   | 3111(7)    |
| C4          | 5786(13)   | 5629(5)   | 4620(8)    |
| C6          | 1741(13)   | 5691(5)   | 4350(9)    |
| C8          | 7715(7)    | 3510(3)   | 3231(5)    |
| C10         | 7000(9)    | 3027(3)   | 3199(5)    |
| C12         | 6073(9)    | 2917(3)   | 2450(7)    |
| C14         | 5860(8)    | 3290(4)   | 1732(5)    |
| C16         | 6574(9)    | 3774(3)   | 1763(5)    |
| C18         | 7501(8)    | 3884(2)   | 2513(6)    |
| C20         | 4409(13)   | 6407(4)   | 3942(7)    |
| C22         | 8651(12)   | 3654(4)   | 4078(8)    |
| C24         | 11232(15)  | 4248(6)   | 4959(10)   |
| C26         | 10873(12)  | 3678(5)   | 3126(8)    |
| C13         | 3229(13)   | 5623(5)   | 4734(8)    |
| C7          | 4421(15)   | 4955(5)   | 3125(8)    |
| C15         | 10931(14)  | 3645(5)   | 4911(8)    |
| C2          | 10251(13)  | 2849(5)   | 4001(8)    |
| C17         | 12475(12)  | 3556(6)   | 3012(9)    |
| C9          | 7169(14)   | 5711(6)   | 4066(9)    |
| C19         | 3063(7)    | 6956(3)   | 5100(6)    |
| C5          | 3006(9)    | 7307(3)   | 5867(6)    |

| <b>Atom</b> | <b>X</b>   | <b>Y</b>  | <b>Z</b>   |
|-------------|------------|-----------|------------|
| C21         | 4251(11)   | 7448(3)   | 6344(4)    |
| C11         | 5551(9)    | 7239(4)   | 6053(5)    |
| C23         | 5608(7)    | 6888(3)   | 5287(5)    |
| C3          | 4363(9)    | 6747(3)   | 4810(4)    |
| C25         | 9659(17)   | 2558(6)   | 4847(9)    |
| Br1A        | 5255.2(19) | 3986.2(7) | 5035.3(11) |
| Cl3         | 7928.4(16) | 4760.7(6) | 6216.9(11) |
| Br4A        | 3501.7(15) | 3405.0(5) | 7094.9(9)  |
| Br2C        | 4075.6(17) | 4975.8(6) | 6925.7(9)  |
| Cl4         | 4075.6(17) | 4975.8(6) | 6925.7(9)  |
| Cl5         | 3501.7(15) | 3405.0(5) | 7094.9(9)  |
| Cl1         | 7785.3(14) | 3263.2(5) | 6814.8(9)  |

**Table S9.** Fractional Atomic Coordinates ( $\times 10^4$ ) for TEBA-5.

| <b>Atom</b> | <b>X</b>  | <b>Y</b>  | <b>Z</b>    |
|-------------|-----------|-----------|-------------|
| Sb1         | 6698.0(5) | 756.4(3)  | 3401.82(15) |
| Br5         | 7244.6(8) | 2502.7(5) | 3522.4(3)   |
| Br1         | 4706.7(8) | 692.1(6)  | 4237.0(2)   |
| Br2         | 8967.7(8) | 397.3(6)  | 4096.0(3)   |
| Br4         | 4555.8(8) | 1291.6(6) | 2736.7(3)   |
| Br3         | 8419.2(9) | 576.8(5)  | 2529.1(3)   |
| N1          | 2303(5)   | 3498(4)   | 4043.7(19)  |
| N2          | 1949(6)   | 8405(4)   | 3303(2)     |
| C6          | 4739(6)   | 4273(5)   | 3989(2)     |
| C23         | 1811(8)   | 9388(5)   | 3057(3)     |
| C10         | 1628(7)   | 4394(5)   | 3828(3)     |
| C5          | 5486(7)   | 4313(6)   | 4480(3)     |
| C7          | 3813(7)   | 3436(5)   | 3857(3)     |

| <b>Atom</b> | <b>X</b> | <b>Y</b> | <b>Z</b> |
|-------------|----------|----------|----------|
| C1          | 5008(7)  | 4987(6)  | 3628(3)  |
| C25         | 3286(8)  | 7898(5)  | 3136(3)  |
| C9          | 2217(8)  | 3519(5)  | 4646(2)  |
| C24         | 1902(9)  | 9390(5)  | 2461(3)  |
| C20         | 1922(8)  | 8563(5)  | 3909(2)  |
| C12         | 1283(9)  | 2573(7)  | 3249(3)  |
| C13         | 1536(9)  | 2617(6)  | 3847(3)  |
| C16         | 3088(8)  | 7205(5)  | 4393(3)  |
| C22         | -761(8)  | 8151(6)  | 3203(3)  |
| C15         | 3026(10) | 6452(6)  | 4733(3)  |
| C3          | 6628(8)  | 5759(6)  | 4208(3)  |
| C21         | 744(8)   | 7755(5)  | 3133(3)  |
| C2          | 5909(9)  | 5728(7)  | 3737(3)  |
| C26         | 4660(8)  | 8446(6)  | 3227(3)  |
| C17         | 1864(8)  | 7695(5)  | 4245(2)  |
| C8          | 2799(10) | 2661(6)  | 4931(3)  |
| C4          | 6396(8)  | 5046(7)  | 4577(3)  |
| C14         | 1756(10) | 6163(6)  | 4943(3)  |
| C11         | 44(8)    | 4511(6)  | 3941(3)  |
| C19         | 545(9)   | 6639(6)  | 4803(3)  |
| C18         | 609(8)   | 7388(6)  | 4463(3)  |

**Table S10.** Atomic Occupancy for TEBA-1, TEBA-2, TEBA-3 and TEBA-4.

| <b>Atom</b>  | <b>Occupancy</b> | <b>Atom</b>  | <b>Occupancy</b> | <b>Atom</b>  | <b>Occupancy</b> | <b>Atom</b>  | <b>Occupancy</b> |
|--------------|------------------|--------------|------------------|--------------|------------------|--------------|------------------|
| <b>(TEBA</b> |                  | <b>(TEBA</b> |                  | <b>(TEBA</b> |                  | <b>(TEBA</b> |                  |
| <b>-1)</b>   |                  | <b>-2)</b>   |                  | <b>-3)</b>   |                  | <b>-4)</b>   |                  |
| Cl1          | 0.658(3)         | Br4          | 0.602(4)         | Br1          | 0.872(7)         | Br1          | 0.939(9)         |

| Atom  | Occupancy | Atom  | Occupancy | Atom  | Occupancy | Atom  | Occupancy |
|-------|-----------|-------|-----------|-------|-----------|-------|-----------|
| (TEBA |           | (TEBA |           | (TEBA |           | (TEBA |           |
| -1)   |           | -2)   |           | -3)   |           | -4)   |           |
| Br1   | 0.262(3)  | Br1   | 0.514(5)  | Br4   | 0.828(8)  | Br3   | 0.792(9)  |
| Cl4   | 0.991(3)  | Cl4   | 0.760(4)  | Br2   | 0.602(7)  | Cl2   | 0.524(9)  |
| Br4   | 0.097(3)  | Cl1   | 0.790(4)  | Cl1   | 0.471(7)  | Br1A  | 0.476(9)  |
| Br3   | 0.078(3)  | Cl5   | 0.964(4)  | Cl2   | 0.793(7)  | Cl3   | 0.208(9)  |
| Br2   | 0.342(3)  | Cl3   | 0.486(5)  | Cl3a  | 0.172(8)  | Br4A  | 0.922(9)  |
| Cl2a  | 0.903(3)  | Cl2   | 0.398(4)  | Cl2a  | 0.398(7)  | Br2C  | 0.837(8)  |
| Cl5a  | 0.738(3)  | Br2   | 0.240(4)  | Br1a  | 0.529(7)  | Cl4   | 0.163(8)  |
| Cl3a  | 0.922(3)  | Br3   | 0.210(4)  | Br3   | 0.207(7)  | Cl5   | 0.078(9)  |
| Br5   | 0.009(3)  | Br5a  | 0.036(4)  | Cl5   | 0.128(7)  | Cl1   | 0.061(9)  |

**Table S11.** Comparison of Cl:Br ratios of measured by SCXRD and EDS.

|                            | Cl:Br | Cl:Br     | Cl:Br     | Cl:Br     | Cl:Br     | Cl:Br |
|----------------------------|-------|-----------|-----------|-----------|-----------|-------|
| <b>Raw materials ratio</b> | 5:0   | 4:1       | 3:2       | 2:3       | 1:4       | 0:5   |
| <b>SCXRD</b>               | 5:0   | 4.2:0.8   | 3.4:1.6   | 1.96:3.04 | 1.03:3.97 | 0:5   |
| <b>EDS</b>                 | 5:0   | 92.5:19.9 | 50.3:23.5 | 22.9:35.5 | 15.6:64.7 | 0:5   |

**Table S12.** The optical parameters of (TEBA)<sub>2</sub>SbCl<sub>5-x</sub>Br<sub>x</sub> powders.

|               | PLE  | PL   | FWHM | Stokes shift | Lifetime | PLQY  | E <sub>g</sub> |
|---------------|------|------|------|--------------|----------|-------|----------------|
|               | (nm) | (nm) | (nm) | (nm)         | (μs)     | (%)   | (eV)           |
| <b>TEBA-0</b> | 371  | 586  | 117  | 215          | 3.83     | 99.25 | 3.16           |
| <b>TEBA-1</b> | 382  | 598  | 125  | 216          | 2.72     | 98.10 | 2.99           |
| <b>TEBA-2</b> | 385  | 603  | 128  | 218          | 2.04     | 73.83 | 2.95           |



|               | PLE  | PL   | FWHM | Stokes shift | Lifetime | PLQY  | E <sub>g</sub> |
|---------------|------|------|------|--------------|----------|-------|----------------|
|               | (nm) | (nm) | (nm) | (nm)         | (μs)     | (%)   | (eV)           |
| <b>TEBA-3</b> | 395  | 621  | 129  | 226          | 1.26     | 37.90 | 2.93           |
| <b>TEBA-4</b> | 401  | 627  | 132  | 226          | 0.84     | 17.86 | 2.88           |
| <b>TEBA-5</b> | 404  | 635  | 132  | 231          | 0.29     | 2.8   | 2.84           |

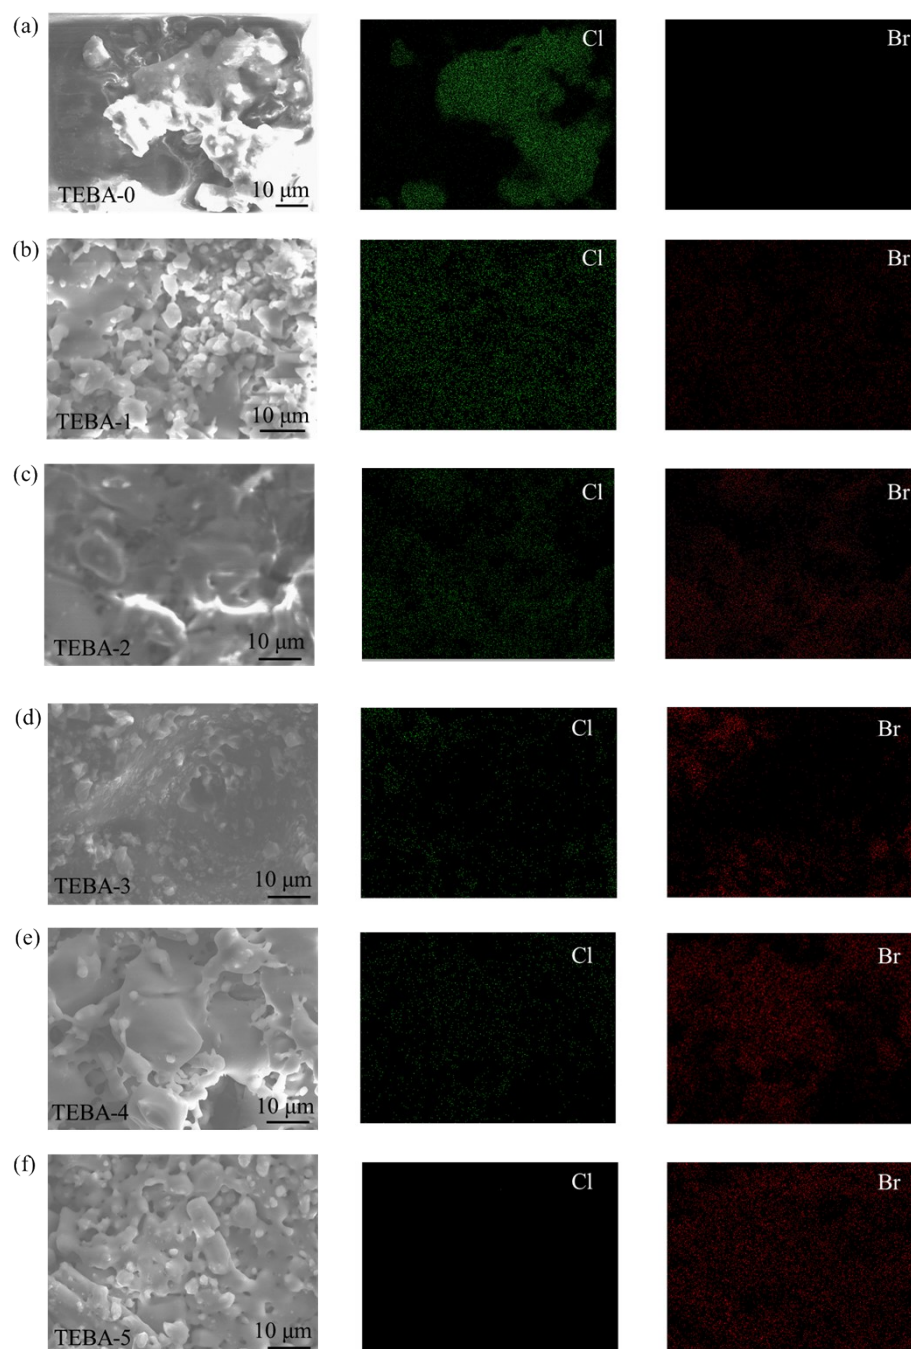

**Figure S1** EDS elemental mapping of  $(\text{TEBA})_2\text{SbCl}_{5-x}\text{Br}_x$ . (a) TEBA-0, (b) TEBA-1, (c) TEBA-2,

(d) TEBA-3, (e) TEBA-4 and (f) TEBA-5.

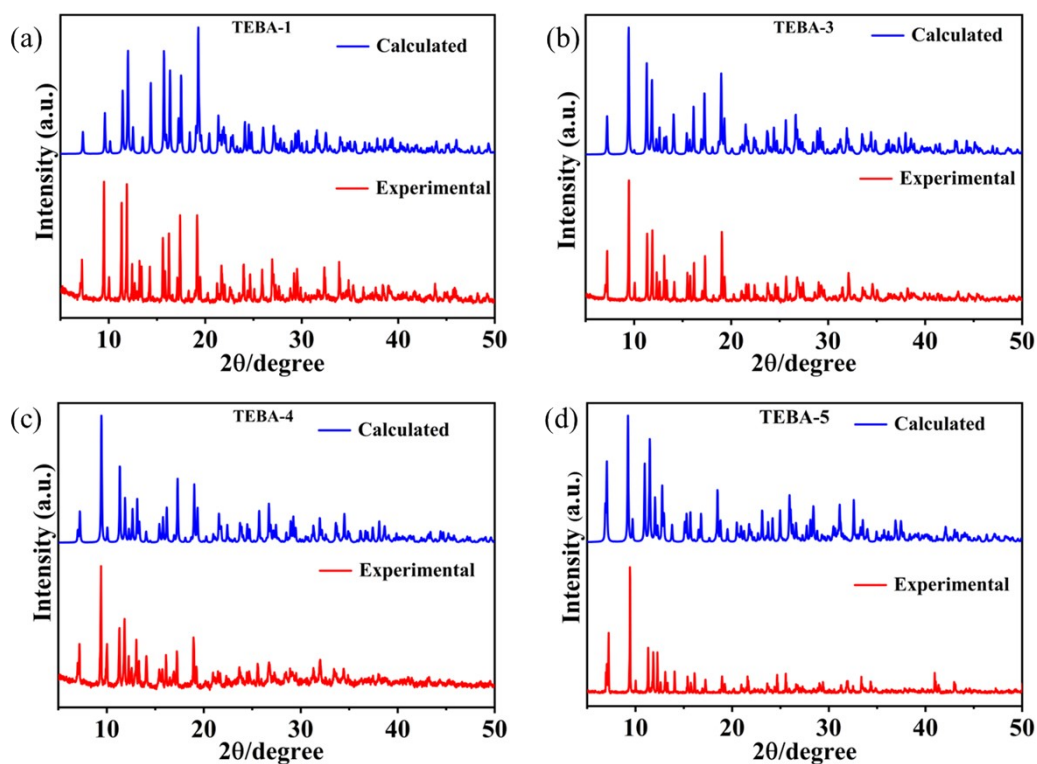

**Figure S2.** PXRD patterns and simulated patterns of SCXRD of TEBA-1, TEBA-3, TEBA-4, and TEBA-5.

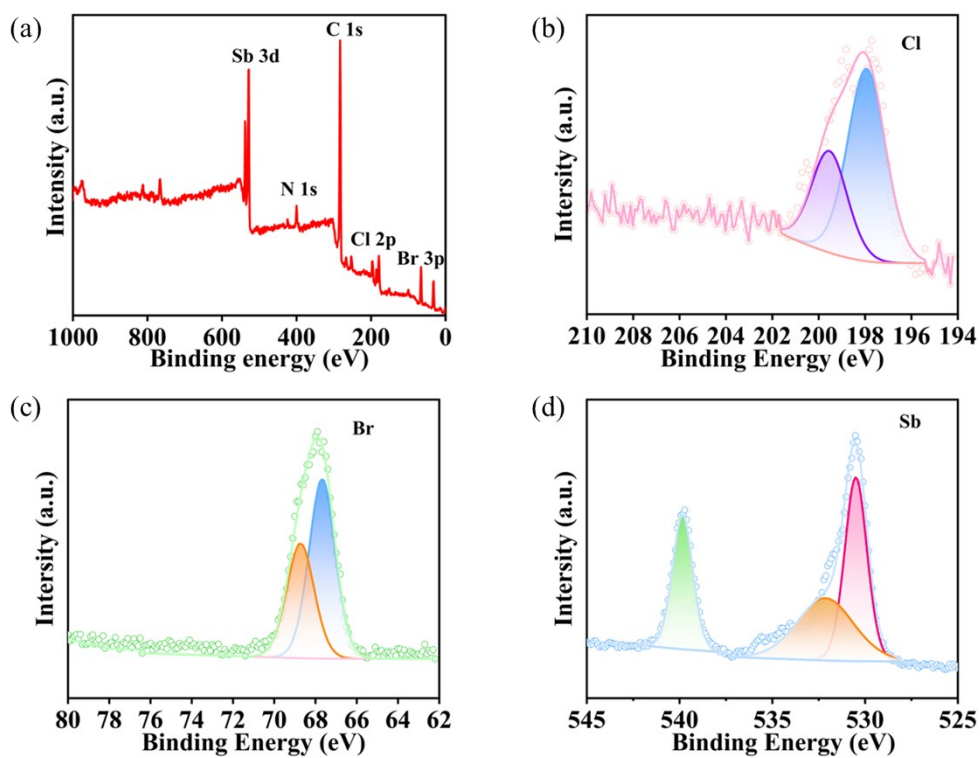

**Figure S3.** (a) X-ray photoelectron spectroscopy (XPS) of TEBA-2. High-resolution spectra of (b)

Cl 2p, (c) Br 3p, and (d) Sb 3d.

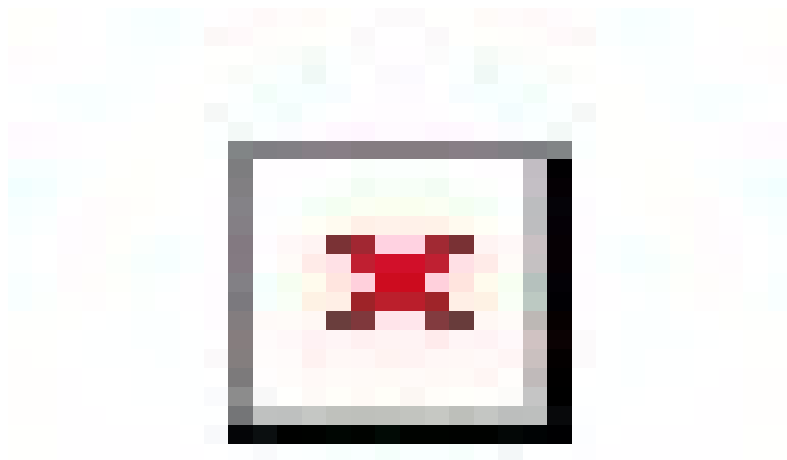

**Figure S4.** TGA curves of  $(\text{TEBA})_2\text{SbCl}_{5-x}\text{Br}_x$ .

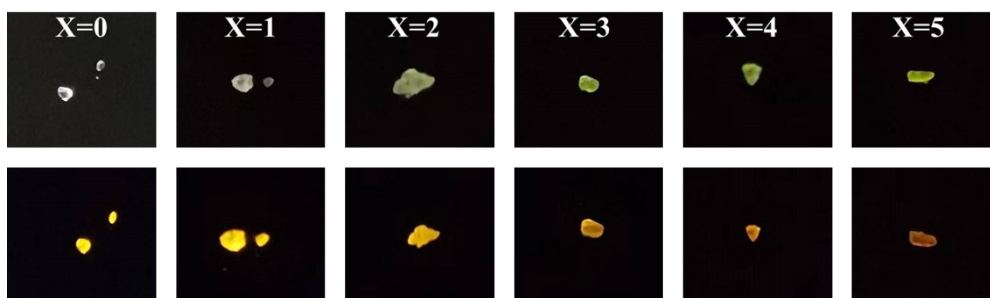

**Figure S5.** The photographs of  $(\text{TEBA})_2\text{SbCl}_{5-x}\text{Br}_x$  single crystals under ambient light and ultraviolet light of 365 nm.

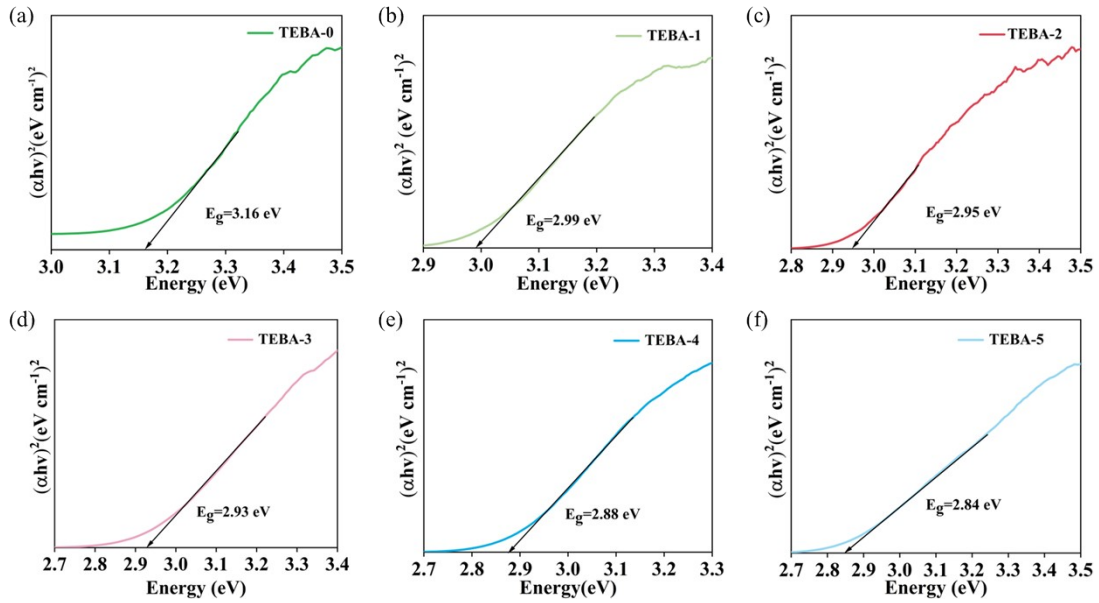

**Figure S6.** The energy gaps of  $(\text{TEBA})_2\text{SbCl}_{5-x}\text{Br}_x$  single crystals. (a) TEBA-0. (b) TEBA-1. (c) TEBA-2. (d) TEBA-3. (e) TEBA-4. (f) TEBA-5.

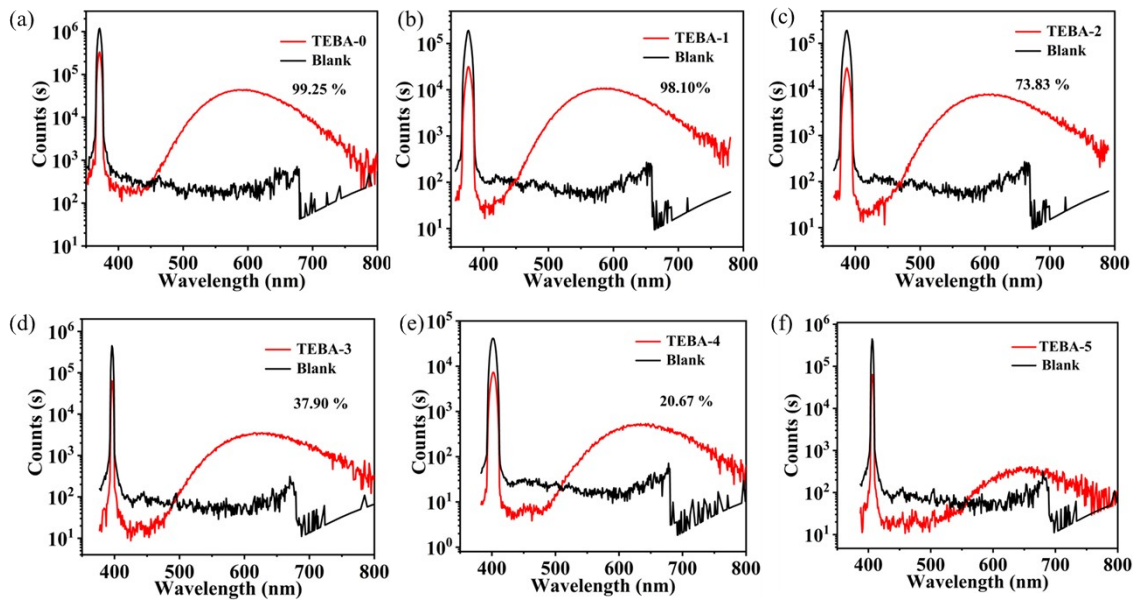

**Figure S7.** The PLQYs of  $(\text{TEBA})_2\text{SbCl}_{5-x}\text{Br}_x$  single crystals. (a) TEBA-0. (a) TEBA-1. (a) TEBA-2. (a) TEBA-3. (a) TEBA-4. (a) TEBA-5.

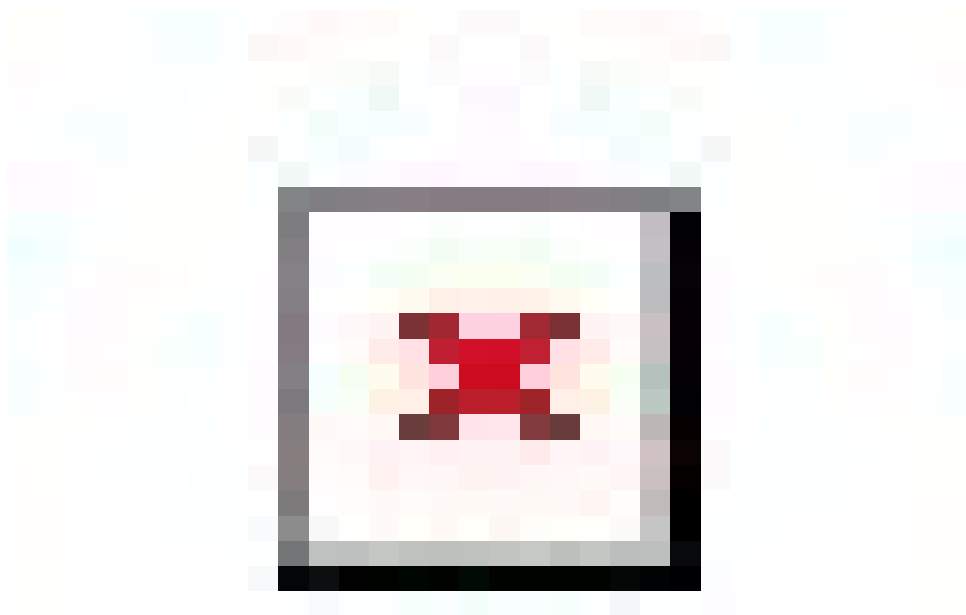

**Figure S8.** The 1931 Commission Internationale de L'Eclairage (CIE) chromaticity diagram of  $(\text{TEBA})_2\text{SbCl}_{5-x}\text{Br}_x$ .

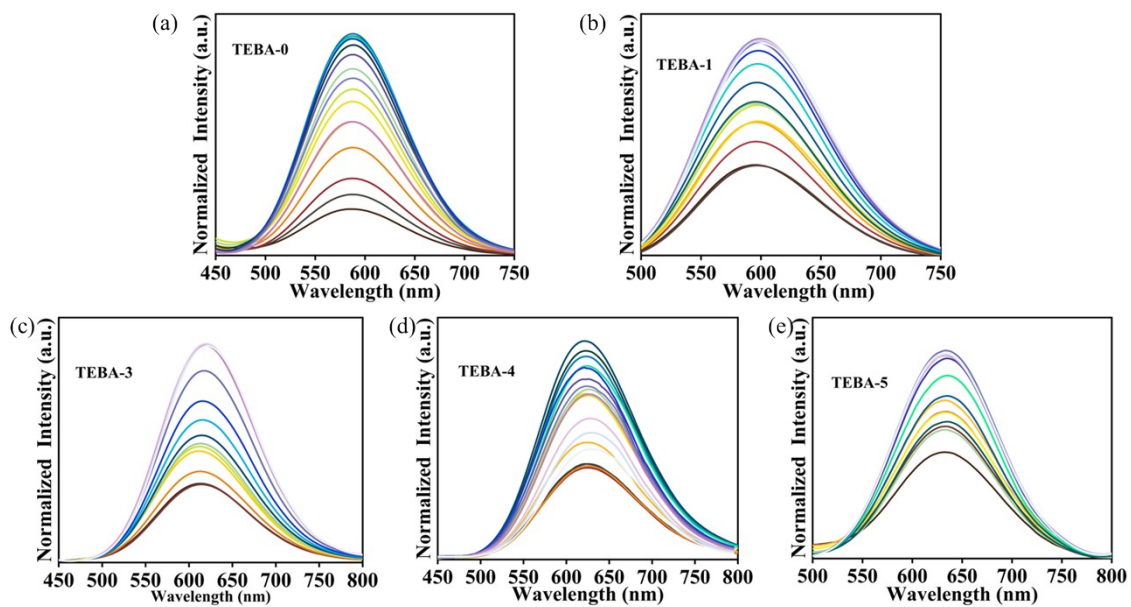

**Figure S9.** Excitation-wavelength dependent PL spectra of (a) TEBA-0. (b) TEBA-1. (c) TEBA-3. (d) TEBA-4. and (e) TEBA-5.

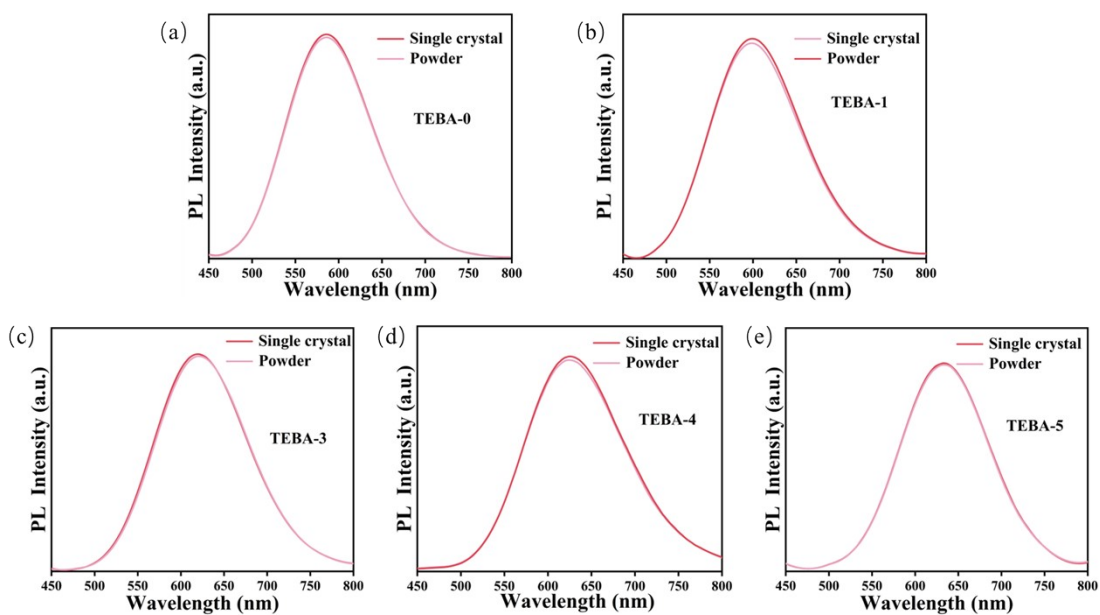

**Figure S10.** PL spectra of powders and crystals of (a) TEBA-0. (b) TEBA-1. (c) TEBA-3. (d) TEBA-4. and (e) TEBA-5.

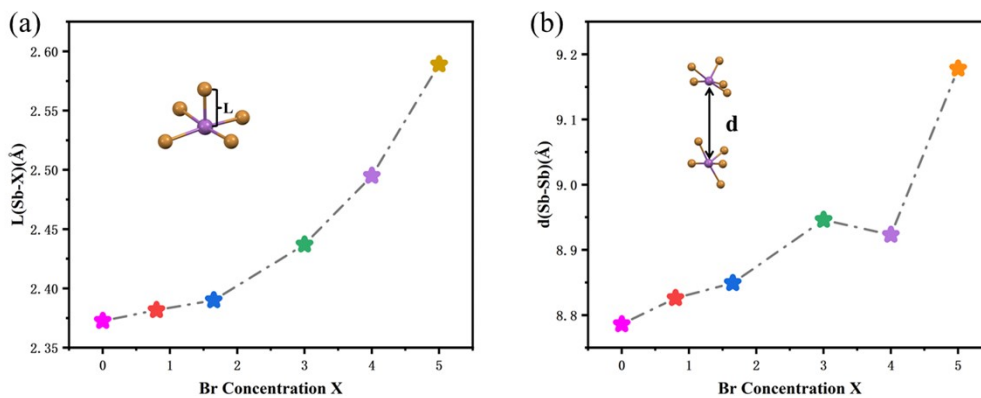

**Figure S11.** (a) The vertical Sb-Cl bond length (b) The nearest polyhedral distance versus the Br concentration in  $(\text{TEBA})_2\text{SbCl}_{5-x}\text{Br}_x$ .

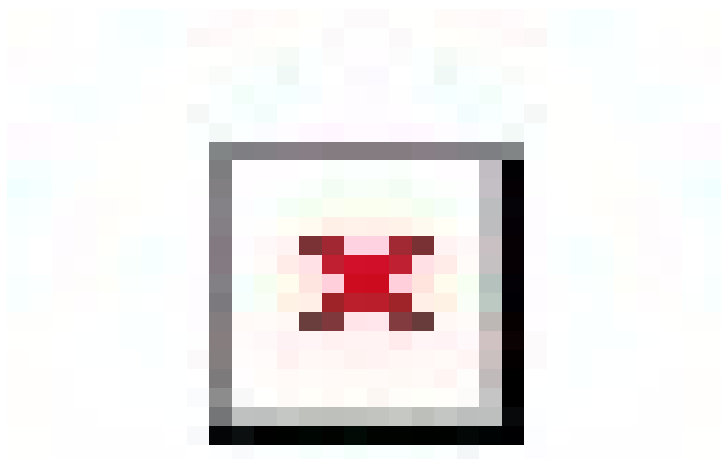

**Figure S12.** RL spectra with a dose rate range from 0.578 to 5.01 mGy<sub>air</sub> s<sup>-1</sup>.

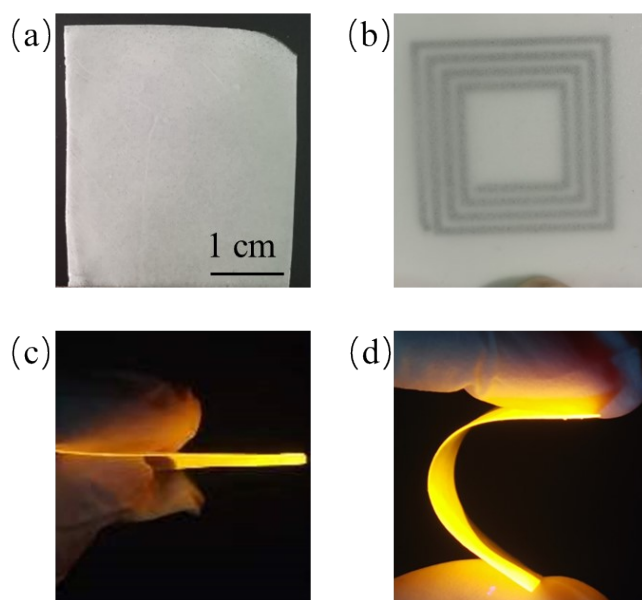

**Figure S13.** The relevant physical properties of the scintillator film (a) Size. (b) Transparency. (c) and (d) flexibility.

## References

- [1] G. M. Sheldrick, SHELXS-2014, Program for Crystal Structure Solution, University of Gottingen, Germany, 2014.
- [2] G. M. Sheldrick, SHELXL-2014, Program for the Refinement of Crystal Structure, University of Gottingen, Germany, 2014.
